# Supplementary material for: Provider acceptance of an automated electronic alert for acute kidney injury
Source: PubMed Central journal article supplement — Clin Kidney J. 2016 Jun 10;9(4):567–71. doi: 10.1093/ckj/sfw054 (PMC4957729; doi:10.1093/ckj/sfw054), 2016-06-10
Supplement: supp_sfw054_sfw054supp.pdf [file supp_sfw054_sfw054supp.pdf]

# AKI Alert Provider survey

Please complete the survey below.

Thank you!

Have you personally received an AKI alert page in the past 6 months?

- Yes
- No

Given that you have received at least one electronic alert for an AKI event during your hospital rotation in the past, have you completed this survey before?

- Yes
- No

---

## Demographic Information

Date of Survey

\_\_\_\_\_

What is your last name?

\_\_\_\_\_

What is your first name?

\_\_\_\_\_

What was your clinical role/ position when you received electronic alerts?

- Intern
- Resident
- Nurse Practitioner
- Physician Assistant
- Attending
- Pharmacist
- Other

What is your post-graduate year(PGY) of training?

- PGY-1
- PGY-2
- PGY-3
- PGY-4
- PGY-5
- PGY-6
- PGY-7

How long have you worked in this position?

- Less than 1 year
- 1 year
- 2 years
- 3 years
- 4 years
- 5 years or over

What service were you on when you received your most recent alert?

- General Medicine
- Renal Subspecialty
- ID Subspecialty
- Pulmonary Subspecialty
- Liver Subspecialty
- Medical Intensive Care Unit
- Cardiology Intensive Care Unit
- Cardiology Intermediate Care Unit
- Cardiology, Electrophysiology
- Cardiology, Heart Failure
- Oncology, Liquid
- Oncology, Solid
- Neurology
- Neurology, Stroke
- Neurology, Critical Care
- Neurosurgery
- Obstetrics & Gynecology
- Ophthalmology
- Oral and Maxillofacial Surgery
- Otorhinolaryngology
- Pathology and Laboratory Medicine
- Psychiatry
- Interventional Radiology
- General Surgery
- Surgical Intensive Care Unit
- Cardiothoracic Intensive Care Unit
- Cardiothoracic Surgery
- Liver Transplant
- Kidney Transplant
- Other

As the covering pharmacist, were you in training at the time of receiving the alert?

- Yes
- No

What was your level of training?

- Graduate
- PGY-1
- PGY-2

How long have you had worked in that position?

- Less than 1 year
- 1 year
- 2 years
- 3 years
- 4 years
- 5 years
- Over 5 years

What floors were you covering when you received alerts in the past 30 days?

- FP12
  - FP14
  - FP8(CCU)
  - FP9(MICU)
  - FP5
  - FP10(CICU)
  - FP11
  - RP5
  - RP3
  - RP6
  - RP7
  - RP4/RP5
  - RP1/ RP2
  - D6S/ D1
  - S9/R9
  - S7/S8
  - S10
  - S11/ S12
  - R6
  - OR/PACU
  - ED
  - ICN/ NS8/LD
  - None of the above
- (You may choose more than one)

---

**For the next set of questions please consider the last 30 days you have been on service:**

On average, how many alerts did you receive on a daily basis?

- 0-1 alerts (1)
- 1-2 alerts (2)
- 2-3 alerts (3)
- 3-4 alerts (4)
- 4-5 alerts (5)
- More than 5 alerts (6)

The amount of alerts I received adversely impacted overall patient care.

- Strongly Disagree (1)
- Disagree (2)
- Neither Agree nor Disagree(3)
- Agree (4)
- Strongly Agree (5)

The amount of alerts I received impeded my workflow.

- Strongly Disagree (1)
- Disagree (2)
- Neither Agree nor Disagree(3)
- Agree (4)
- Strongly Agree (5)

I was already aware that the patient/s had AKI when I received an alert.

- Never (1)
- Rarely (2)
- Sometimes (3)
- Most of the time (4)
- All the time (5)

I would have recognized AKI without having been alerted.

- Never (1)
- Rarely (2)
- Sometimes (3)
- Most of the time (4)
- All the time (5)

The electronic alert made me recognize AKI comparatively earlier.

- Strongly Agree (1)
- Agree (2)
- Neither Agree nor Disagree(3)
- Disagree (4)
- Strongly Disagree (5)

In general, the electronic AKI Alert system led me to document AKI (write it in the chart) as a diagnosis more frequently.

- Never (1)  
 Rarely (2)  
 Sometimes (3)  
 Most of the time (4)  
 All the time (5)

### AKI Alert system and QI

In general, the electronic AKI Alert system led me or my team to re-dose or discontinue medications earlier.

- Never (1)  
 Rarely (2)  
 Sometimes (3)  
 Most of the time (4)  
 All the time (5)

In general, the electronic AKI Alert system led me or my team to recommend redosing or discontinuing certain medications.

- Never (1)  
 Rarely (2)  
 Sometimes (3)  
 Most of the time (4)  
 All the time (5)

In general, the AKI Alert System led me or my team to change IV fluid management earlier.

- Never (1)  
 Rarely (2)  
 Sometimes (3)  
 Most of the time (4)  
 All the time (5)

In general, the AKI Alert System led me or my team to avoid testing with contrast.

- Never (1)  
 Rarely (2)  
 Sometimes (3)  
 Most of the time (4)  
 All the time (5)

In general, the AKI Alert System led me or my team to transfer the patient to the ICU more frequently.

- Never (1)  
 Rarely (2)  
 Sometimes (3)  
 Most of the time (4)  
 All the time (5)

In general, the AKI Alert System led me or my team to delay discharge of the patient.

- Never (1)  
 Rarely (2)  
 Sometimes (3)  
 Most of the time (4)  
 All the time (5)

In general, the AKI Alert System led me or my team to order urinalysis, urine electrolytes and/or creatinine earlier.

- Never (1)  
 Rarely (2)  
 Sometimes (3)  
 Most of the time (4)  
 All the time (5)

In general, the AKI Alert System led me or my team to order a retroperitoneal ultrasound.

- Never (1)  
 Rarely (2)  
 Sometimes (3)  
 Most of the time (4)  
 All the time (5)

In general, the AKI Alert System led me or my team to order a nuclear renal scan.

- Never (1)  
 Rarely (2)  
 Sometimes (3)  
 Most of the time (4)  
 All the time (5)

In general, the AKI Alert System led me or my team to order nursing to record the patient's inputs and outputs.

- Never (1)
- Rarely (2)
- Sometimes (3)
- Most of the time (4)
- All the time (5)

In general, the AKI Alert System led me to discuss the patient's creatinine with other care providers.

- Never (1)
- Rarely (2)
- Sometimes (3)
- Most of the time (4)
- All the time (5)

In general, the AKI Alert System led me to discuss the results with my patient.

- Never (1)
- Rarely (2)
- Sometimes (3)
- Most of the time (4)
- All the time (5)
- N/A (6)

In general, the AKI Alert System led me or my team to order fewer serum creatinine levels.

- Never (1)
- Rarely (2)
- Sometimes (3)
- Most of the time (4)
- All the time (5)

In general, the AKI Alert System led me to consult the renal / nephrology service.

- Never (1)
- Rarely (2)
- Sometimes (3)
- Most of the time (4)
- All the time (5)

In general, the AKI Alert System improved the care of my patients.

- Strongly Disagree (1)
- Disagree (2)
- Neither Agree nor Disagree(3)
- Agree (4)
- Strongly Agree (5)

After the AKI alert trial ends, would you like to continue to receive AKI alerts?

- Yes
- No

What changes would you recommend to the AKI Electronic Alert System?

---
